# Supplementary figures and images for: Distinct Fatty Acid Compositions of HDL Phospholipids Are Characteristic of Metabolic Syndrome and Premature Coronary Heart Disease—Family Study
Source: MDPI journal article supplement (doi:10.3390/ijms22094908), 2021-05-06

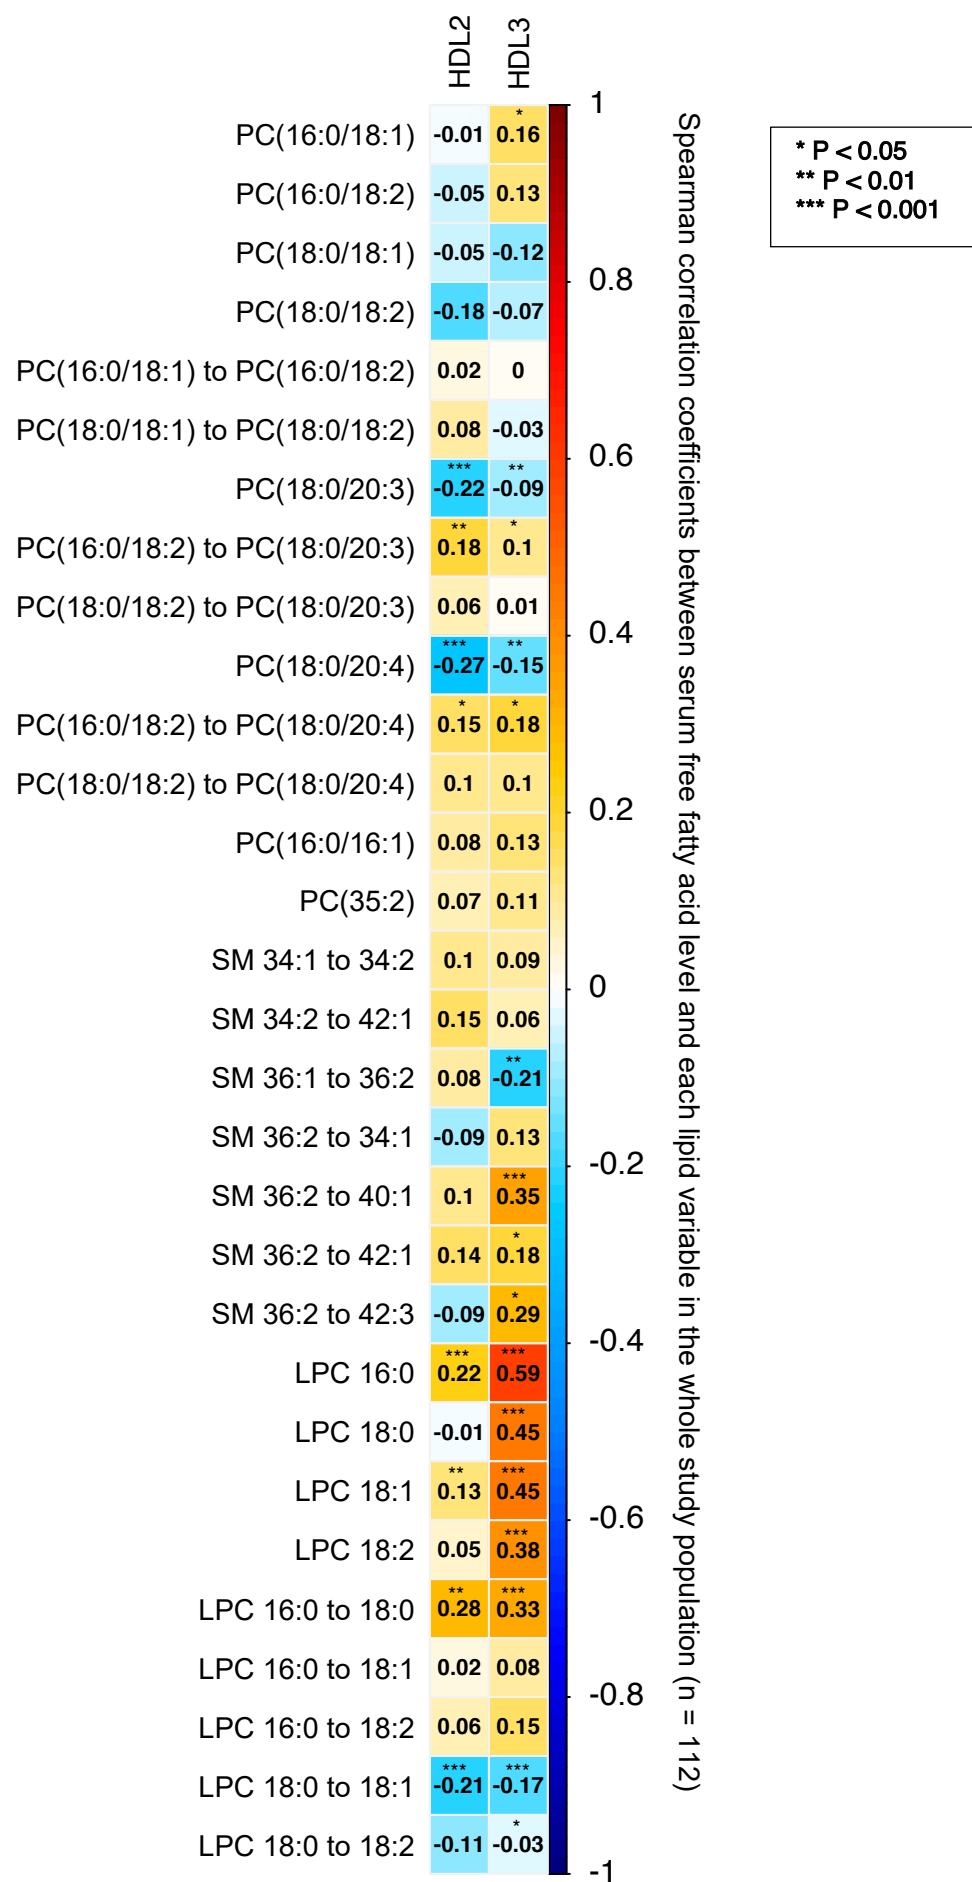

Supplement: s1 [file s1]
